# Supplementary material for: Metabolite Analysis of Alternaria Mycotoxins by LC-MS/MS and Multiple Tools
Source: Molecules. 2023 Apr 6;28(7):3258. doi: 10.3390/molecules28073258 (PMC10096951; doi:10.3390/molecules28073258)

## **Supplementary Materials**

### **Metabolite Analysis of Alternaria Mycotoxins by LC-MS/MS and Multiple Tools**

Yanli You <sup>1</sup>, Qinghua Hu <sup>1</sup>, Nan Liu <sup>1</sup>, Cuiju Xu <sup>1</sup>, Sunan Lu <sup>1</sup>, Tongcheng Xu <sup>2,\*</sup>

and Xin Mao <sup>1,\*</sup>

<sup>1</sup> College of Life Science, Yantai University, Yantai 264005, Shandong, China

<sup>2</sup> Institute of Agro-Food Science and Technology, Shandong Academy of  
Agricultural Sciences, Jinan 250100, Shandong, China

\* Correspondence: xtc@live.com (T.X.); maoxin@ytu.edu.cn (X.M.)

### **Potato Carrot Agar (PCA) Medium Preparation**

40 g carrots and 40 g potatoes are separately washed, peeled, chopped, boiled in one litre water each for 5 min and filtered off. Sterilize for 15 min at 121°C. Take 250 mL potato extract and 250 mL carrot extract, 500 mL distilled water, 15 g agar and sterilize at 121°C for 15 min.

### **Potato Sucrose Agar (PSA) Medium Preparation**

Add 200 g scrubbed and diced potatoes to 1 litre water and boil for 15 min. Let it pass through a fine sieve, add 17 g agar and 20 g sucrose and boil until dissolved. pH  $5.6 \pm 0.1$ .

### **Parameters for Feature Processing with MZmine 2.**

Parameters were settled as follows. In Mass detection: Level 1 noise were settled at 1.0E5 and Level 2 noise were at 1.0E4. In ADAP chromatogram builder: min height intensity was settled at 1.0E5 with  $m/z$  tolerance at 0.02  $m/z$  or 5 ppm. In Chromatogram deconvolution:  $m/z$  range for MS<sup>2</sup> pairing were at 0.05 Da with RT range for MS<sup>2</sup> at 0.10 min. In Join aligner: Weight for  $m/z$ : 75%; Weight for RT: 25%

### **Identification of *Alternaria* Mycotoxin Products.**

A total of samples *Alternaria* isolates were screened for metabolite production by HPLC-HRMS/MS in both positive and negative mode. As shown in the figure below, it was found that the response value of electrospray ionization negative source was

higher than that of electrospray ionization positive source, but the metabolites peaked early in the column and retained for a short time, the positive mode could precisely avoid these problems.

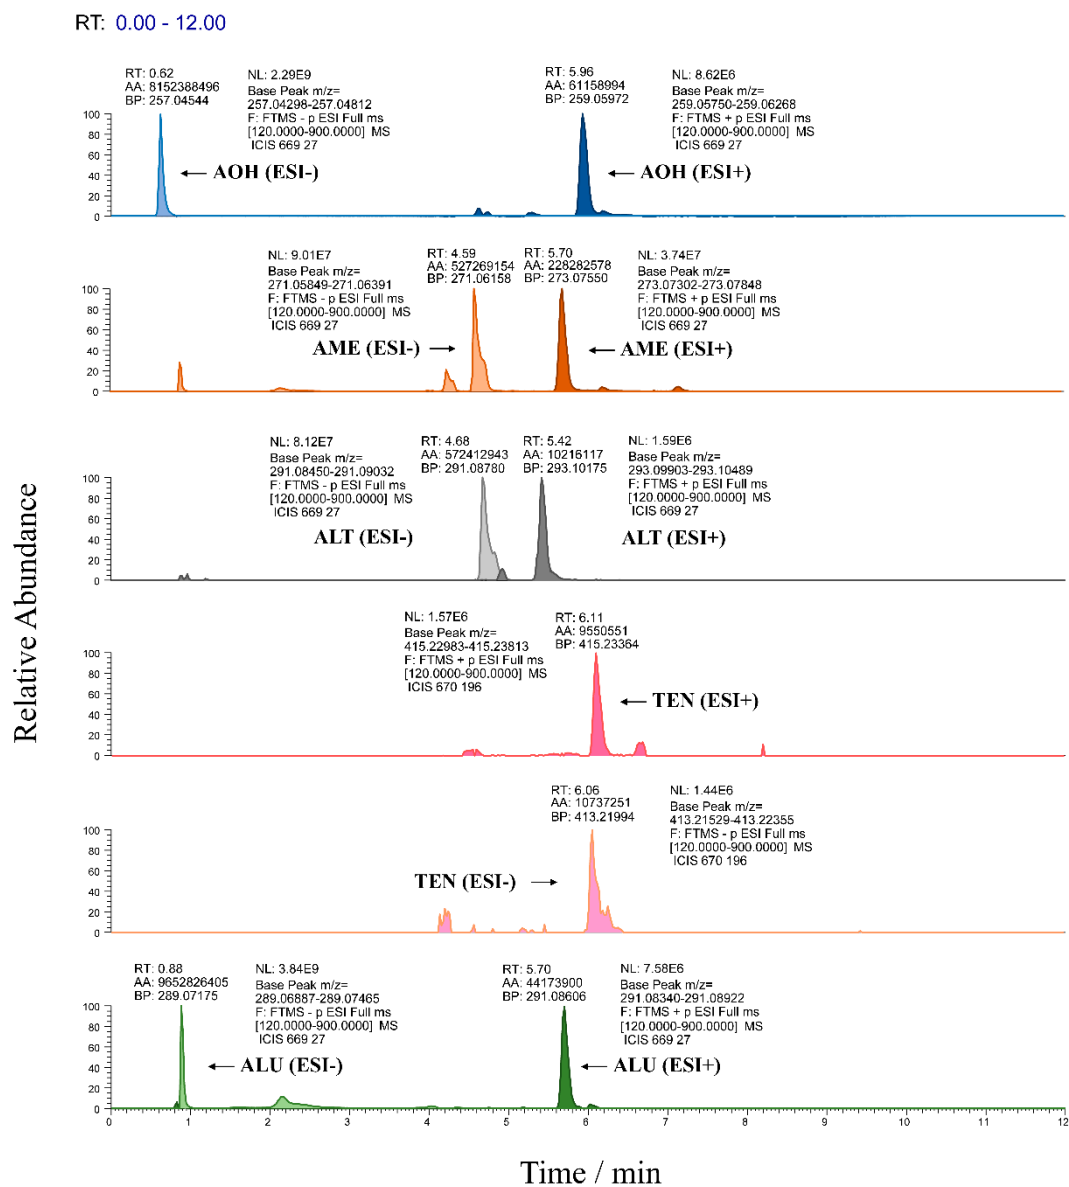

**Table Captions:**

Table S1. Test Fungal Strain Information.

Table S2. Gradient elution procedure of fungi culture products.

Table S3. Database of eight *Alternaria* mycotoxins

Table S4. Compounds with a neutral loss of 79.9568 Da.

Table S5. Custom mycotoxin database

**Figure Captions:**

Figure S1. Seven Fungi inoculated and cultured for 10 days at three different mediums (C: PCA, D: PDA, and S: PSA), (1. 11; 2. 27; 3. 72; 4. 122; 5. 196; 6. M1\_2; 7. B2\_1\_2).

Figure S2. Chromatograms (a) and Chemical structures (b) of eight *Alternaria* mycotoxins standards.

Figure S3. Molecular network creation and visualization in GNPS.

Figure S4. Compound (Kynurenic acid, m/z, 190.0493, RT, 4.31) matched to GNPS-Library Spectrum CCMSLIB00005724328 (In-browser molecular network visualization).

**Table S1. Test Fungal Strain Information.**

Five pathogenic fungi were isolated from pear samples collected from Jinshui sluice pear garden, Jiangxia District, Wuhan City, Hubei Province, China.

Two endophytic fungi were isolated from cherry samples collected from a local supermarket in Yantai, Shandong Province, China.

| No. | ID     | Host             | Species           |
|-----|--------|------------------|-------------------|
| 1   | 11     | Pear (Guiguan)   | <i>Alternaria</i> |
| 2   | 27     | Pear (Eli-II)    | <i>Alternaria</i> |
| 3   | 72     | Pear             | <i>Alternaria</i> |
| 4   | 122    | Pear (Huangguan) | <i>Alternaria</i> |
| 5   | 196    | Pear             | <i>Alternaria</i> |
| 6   | M1_2   | Cherry (Meizao)  | <i>Alternaria</i> |
| 7   | B2_1_2 | Cherry (Huangmi) | <i>Alternaria</i> |

**Table S2. Gradient elution procedure of fungi culture products**

| Retention (min) | Flow (mL/min) | A%               | B%           |
|-----------------|---------------|------------------|--------------|
|                 |               | 0.1% Formic acid | Acetonitrile |
| 0.00            | 0.300         | 95.0             | 5.00         |
| 2.00            | 0.300         | 95.0             | 5.00         |
| 3.00            | 0.300         | 70.0             | 30.0         |
| 4.00            | 0.300         | 60.0             | 40.0         |
| 5.50            | 0.300         | 45.0             | 55.0         |
| 7.50            | 0.300         | 5.00             | 95.0         |
| 9.00            | 0.300         | 95.0             | 5.00         |
| 12.0            | 0.300         | 95.0             | 5.00         |

**Table S3. Database of eight *Alternaria* mycotoxins**

| Compound Name | Chemical Formula                                              | Adduct             | Retention Time | Extracted Mass | Fragment1 | Fragment2 | Fragment3 |
|---------------|---------------------------------------------------------------|--------------------|----------------|----------------|-----------|-----------|-----------|
| AOH           | C <sub>14</sub> H <sub>10</sub> O <sub>5</sub>                | [M+H] <sup>+</sup> | 5.79           | 259.0601       | 185.0597  | 213.0549  | 244.0371  |
| AME           | C <sub>15</sub> H <sub>12</sub> O <sub>5</sub>                | [M+H] <sup>+</sup> | 6.95           | 339.0169       | 230.0579  | 258.0526  | 212.0473  |
| ALT           | C <sub>15</sub> H <sub>16</sub> O <sub>6</sub>                | [M+H] <sup>+</sup> | 5.26           | 273.0757       | 257.0804  | 275.0909  | 229.0857  |
| TEN           | C <sub>22</sub> H <sub>30</sub> N <sub>4</sub> O <sub>4</sub> | [M+H] <sup>+</sup> | 5.95           | 353.0325       | 312.1703  | 330.1812  | 358.2116  |
| ALU           | C <sub>15</sub> H <sub>14</sub> O <sub>6</sub>                | [M+H] <sup>+</sup> | 5.59           | 291.0863       | 273.0756  | 255.0652  | 227.0702  |
| TeA           | C <sub>10</sub> H <sub>15</sub> NO <sub>3</sub>               | [M+H] <sup>+</sup> | 5.63           | 198.1124       | 153.0910  | 181.0859  | 125.0233  |
| ATX-I         | C <sub>20</sub> H <sub>16</sub> O <sub>6</sub>                | [M+H] <sup>+</sup> | 5.64           | 277.0706       | 317.0804  | 271.0754  | 335.0903  |
| MPA           | C <sub>17</sub> H <sub>20</sub> O <sub>6</sub>                | [M+H] <sup>+</sup> | 6.29           | 275.0447       | 207.6556  | 321.0339  | 177.0549  |

**Table S4. Compounds with a neutral loss of 79.9568 Da**

| <b>Molecular weight of<br/>Precursor Ion</b> | <b>Molecular Weight<br/>of Fragments Ion</b> | <b>Retention time</b> | <b>Neutral<br/>loss scan</b> | <b>Medium</b> |
|----------------------------------------------|----------------------------------------------|-----------------------|------------------------------|---------------|
| 354.2304                                     | 274.2735                                     | 7.06                  | 79.9570                      | PCA           |
| 353.0324                                     | 273.0760                                     | 9.33                  | 79.9564                      | PDA           |
| 399.1814                                     | 319.2246                                     | 9.28                  | 79.9568                      | PDA           |
| 353.0327                                     | 273.0763                                     | 9.65                  | 79.9564                      | PSA           |
| 161.9697                                     | 82.0131                                      | 3.23                  | 79.9566                      | PSA           |
| 265.1074                                     | 185.1508                                     | 4.59                  | 79.9566                      | PSA           |
| 184.0639                                     | 104.1068                                     | 0.95                  | 79.9571                      | PSA           |

**Table S5. Custom mycotoxin database**

| <b>NO.</b> | <b>Accuracy<br/>Mass</b> | <b>Retention<br/>time</b> | <b>Compound Name</b>                  | <b>Molecular<br/>Formula</b>                                   |
|------------|--------------------------|---------------------------|---------------------------------------|----------------------------------------------------------------|
| 1          | 259.060                  | 5.79                      | Alternariol                           | C <sub>14</sub> H <sub>10</sub> O <sub>5</sub>                 |
| 2          | 339.017                  | 6.67                      | Alternariol-sulfated                  | C <sub>14</sub> H <sub>10</sub> O <sub>5</sub> SO <sub>3</sub> |
| 3          | 273.076                  | 6.95                      | Alternariol monomethyl ether          | C <sub>15</sub> H <sub>12</sub> O <sub>5</sub>                 |
| 4          | 353.033                  | 9.31                      | Alternariol monomethyl ether-sulfated | C <sub>15</sub> H <sub>12</sub> O <sub>5</sub> SO <sub>3</sub> |
| 5          | 293.102                  | 5.26                      | Altenuene                             | C <sub>15</sub> H <sub>16</sub> O <sub>6</sub>                 |
| 6          | 415.234                  | 5.59                      | Altenusin                             | C <sub>15</sub> H <sub>14</sub> O <sub>6</sub>                 |
| 7          | 198.112                  | 5.63                      | Tenuazonic acid                       | C <sub>10</sub> H <sub>15</sub> NO <sub>3</sub>                |
| 8          | 291.086                  | 5.95                      | Tentoxin                              | C <sub>22</sub> H <sub>30</sub> N <sub>4</sub> O <sub>4</sub>  |
| 9          | 287.056                  | 5.64                      | Altartoxin-I                          | C <sub>20</sub> H <sub>16</sub> O <sub>6</sub>                 |
| 10         | 367.013                  | 6.25                      | Dehydroaltenusin                      | C <sub>15</sub> H <sub>12</sub> O <sub>6</sub>                 |
| 11         | 369.027                  | 9.65                      | Dehydroaltenusin-sulfated             | C <sub>15</sub> H <sub>12</sub> O <sub>6</sub> SO <sub>3</sub> |
| 12         | 275.055                  | 6.03                      | Desmethyldehydroaltenusin             | C <sub>14</sub> H <sub>10</sub> O <sub>6</sub>                 |
| 13         | 355.012                  | 8.34                      | Desmethyldehydroaltenusin-sulfated    | C <sub>14</sub> H <sub>10</sub> O <sub>6</sub> SO <sub>3</sub> |
| 14         | 321.133                  | 6.29                      | Mycophenolic acid                     | C <sub>17</sub> H <sub>20</sub> O <sub>6</sub>                 |
| 15         | 367.013                  | 9.67                      | dehydroaltenusin                      | C <sub>15</sub> H <sub>12</sub> O <sub>6</sub>                 |

**Figure S1.** Seven Fungi inoculated and cultured for 10 days at three different mediums (C: PCA, D: PDA, and S: PSA), (1. 11; 2. 27; 3. 72; 4. 122; 5. 196; 6. M1\_2; 7. B2\_1\_2)

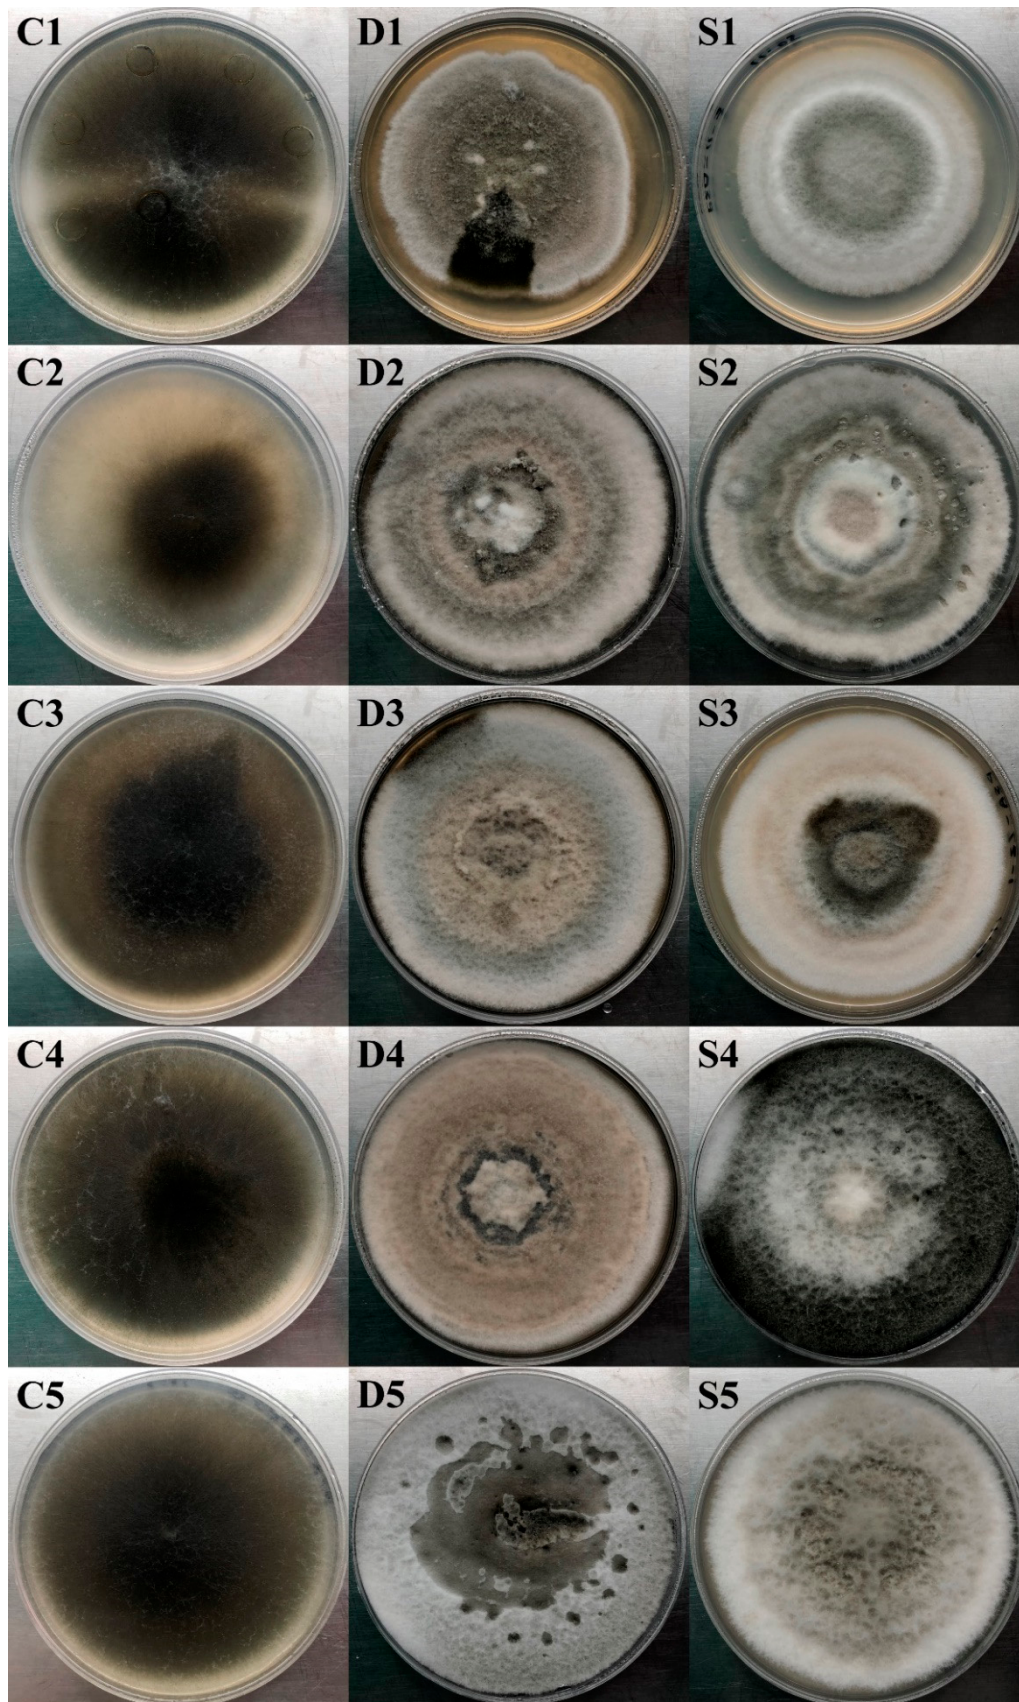

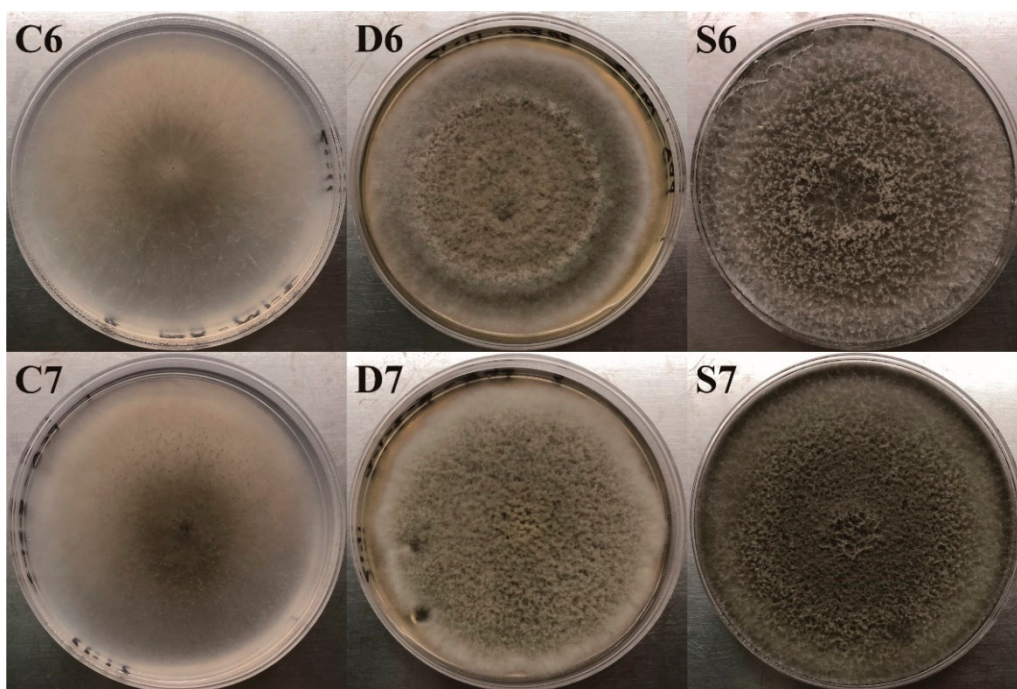

**Figure S2.** Chromatograms (a) and Chemical structures (b) of eight *Alternaria* mycotoxins standards.

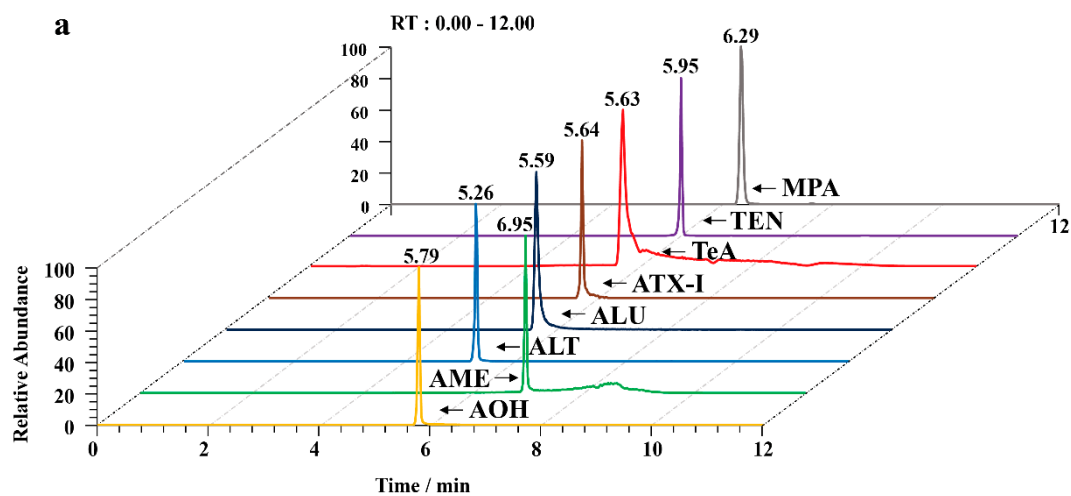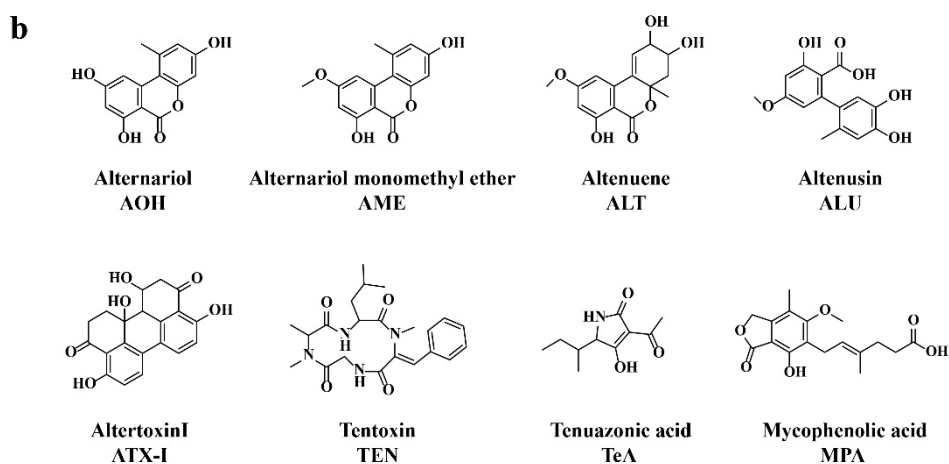

**Figure S3.** Molecular network creation and visualization in GNPS.

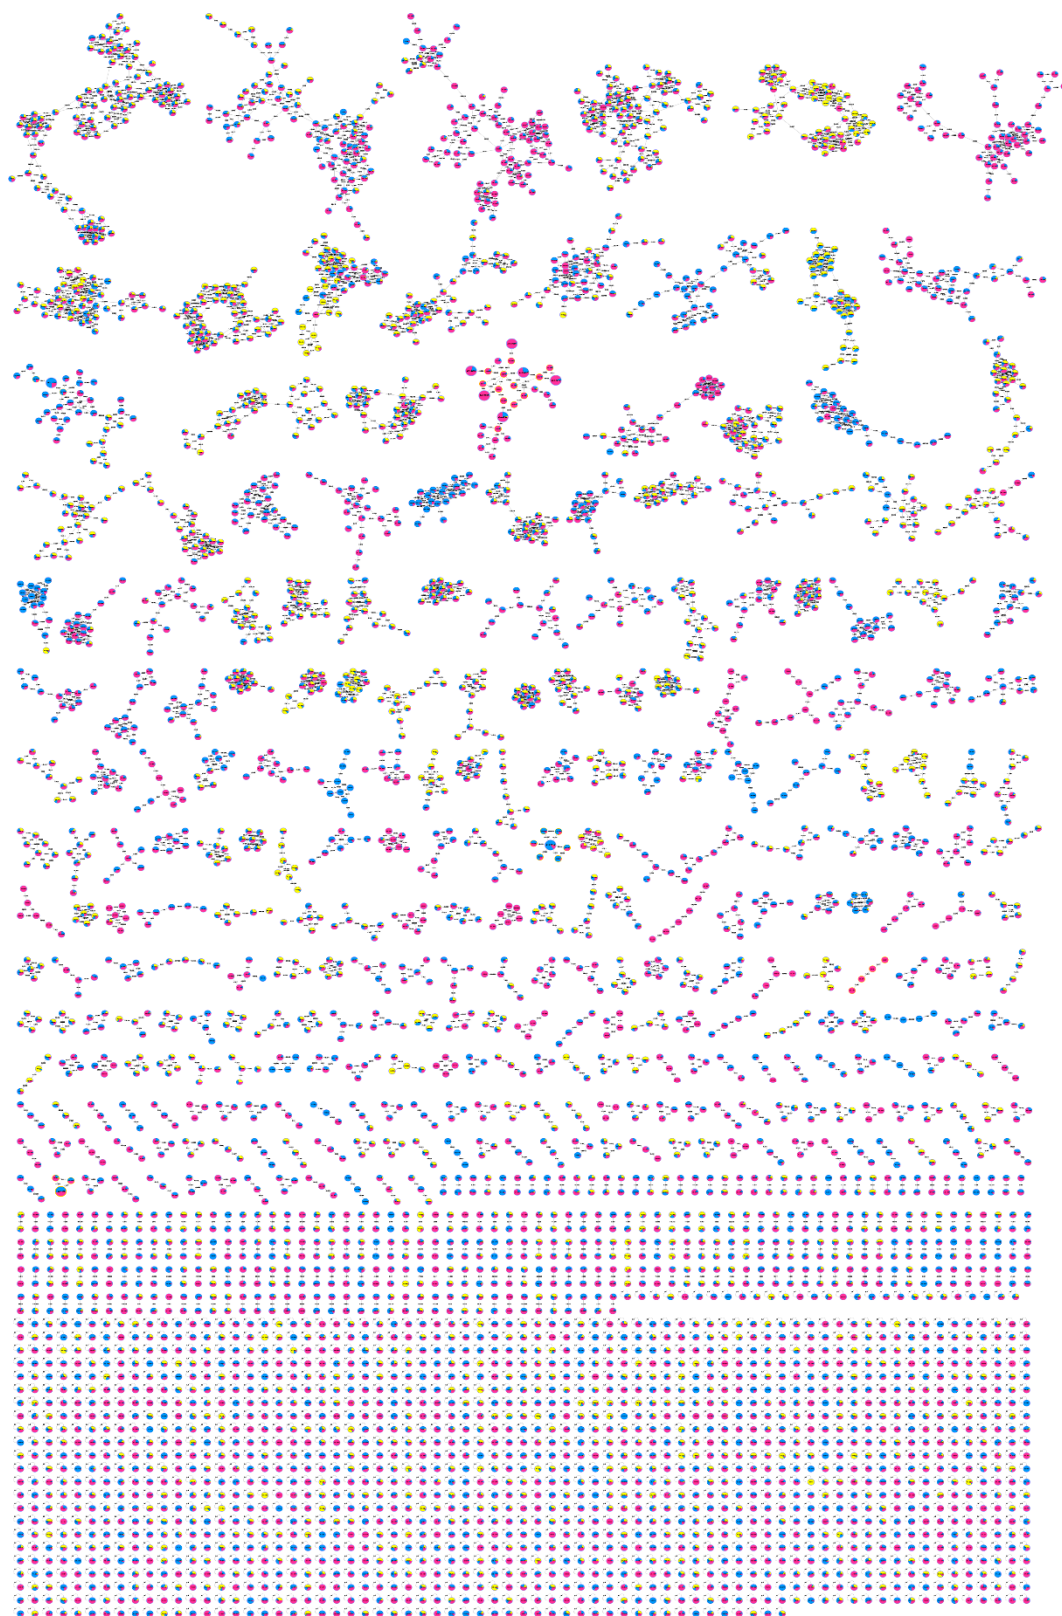

**Figure S4.** Compound (Kynurenic acid,  $m/z$ , 190.0493, RT, 4.31) matched to GNPS-Library Spectrum CCMSLIB00005724328 (In-browser molecular network visualization).

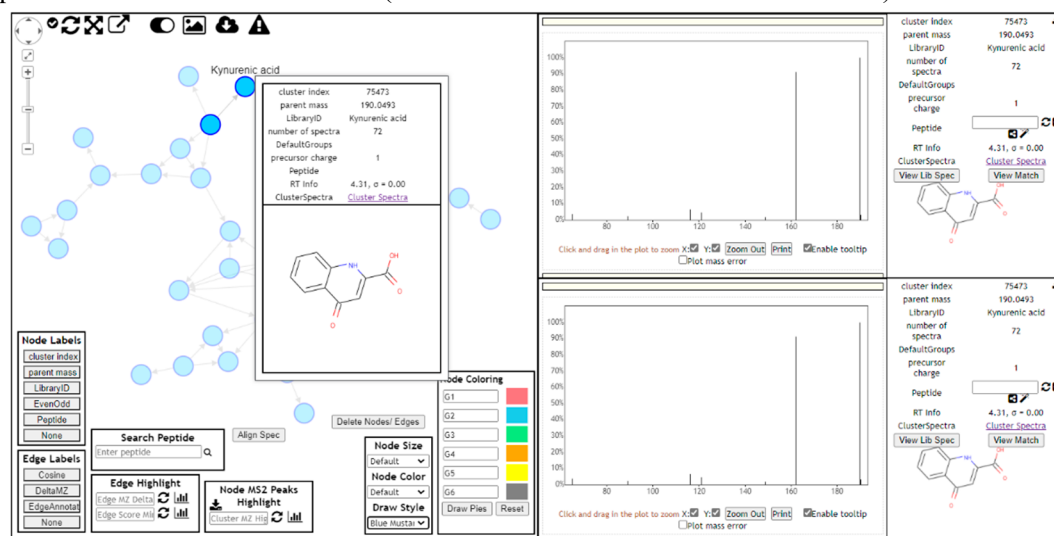

Supplement: Supplementary file 1 [file molecules-28-03258-s001.zip › molecules-2258159-supplementary.pdf]
